# Supplementary material
Source: PubMed Central journal article supplement (PMC1805527)

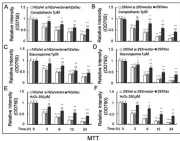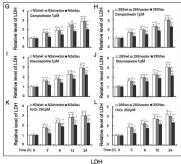

Supplement: pnas_0609303104_1.pdf [file pnas_0609303104_1.pdf]

**A**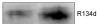**B**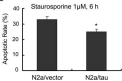

Supplement: pnas_0609303104_2.pdf [file pnas_0609303104_2.pdf]
